# Supplementary material
Source: PubMed Central journal article supplement (PMC4118672)
Supplement: NIHMS548694-supplement-1.pdf [file NIHMS548694-supplement-1.pdf]

## Supplementary Information

### **Splicing factor SRSF6 promotes hyperplasia of sensitized skin**

#### Inventory of Supplementary Information:

1. Supplementary Figure 1: Generation and testing of transgenic *SRSF6* conditional mice.
2. Supplementary Figure 2: Epidermal hyperplasia in mild to moderate lesions.
3. Supplementary Figure 3: Abnormalities in the epidermis following overexpression of SRSF6 for 14-21 days.
4. Supplementary Figure 4: Verrucose hyperplasia in plucked skin of mice overexpressing SRSF6 for 21 days.
5. Supplementary Figure 5: Gene expression analysis of SRSF6-overexpressing skin.
6. Supplementary Figure 6: In vitro differentiation of primary keratinocytes.
7. Supplementary Figure 7: Splicing-target validation.
8. Supplementary Figure 8: SRSF6 and its target TNC is required for wound healing in vitro.
9. Supplementary Figure 9: Original images.
10. Supplementary Table 1a-b: Summary of transgenic mouse and allogenic skin transplantation studies.
11. Supplementary Table 2: Gene expression analysis, Functional gene annotation analysis, and Splicing targets (separate excel-file).
12. Supplementary Table 3a-b: Summary of splicing-target and 5'ss strength analysis.
13. Supplementary Table 4: Summary of nude mouse tumor studies.
14. Supplementary Note 1: Sequences of RT-PCR/qPCR primers, short-hairpins and siRNA oligonucleotides.
15. Supplementary Note 2: Target sequence information for short-hairpin vectors
16. Supplementary References

**Supplementary Figure 1: Generation and testing of transgenic *SRSF6* conditional mice.**

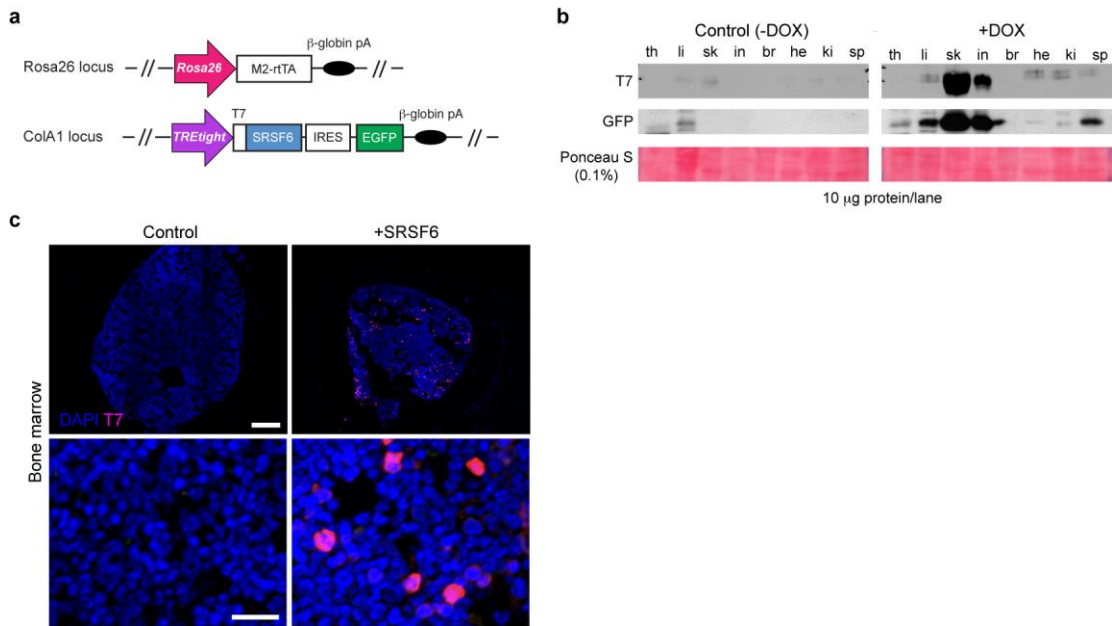

**Supplementary Figure 1** Tet-on transgenic *SRSF6* mouse. (a) A human *SRSF6* cDNA (with an N-terminal T7-tag) was inserted into pBS31'-RBGpA-TREtight-ColA1 flp-in. Upon induction, the cDNA is expressed as a bicistronic transcript, including an IRES element followed by EGFP cDNA. The reverse tetracycline-controlled transactivator (M2-rtTA) is expressed from the Rosa26 locus in KH2 ES cells. (b) Expression of ectopic *SRSF6* (T7) and GFP protein was measured by immunoblotting using antibodies against the T7-tag or GFP upon DOX treatment of R26-rtTA/ColA1-*SRSF6*-transgenic mice. Protein was extracted from thymus (th), liver (li), skin (sk), small intestine (in), brain (br), heart (he), kidney (ki), and spleen (sp). Loading: 0.1% Ponceau S staining. (c) Sporadic expression of ectopic *SRSF6* in bone marrow. Control (left panel), +DOX (right panel). T7-tag antibody detects ectopically expressed *SRSF6*. Bar = 100  $\mu$ m (upper panel), 20  $\mu$ m (lower panel).

**Supplementary Figure 2: Epidermal hyperplasia in mild to moderate lesions.**

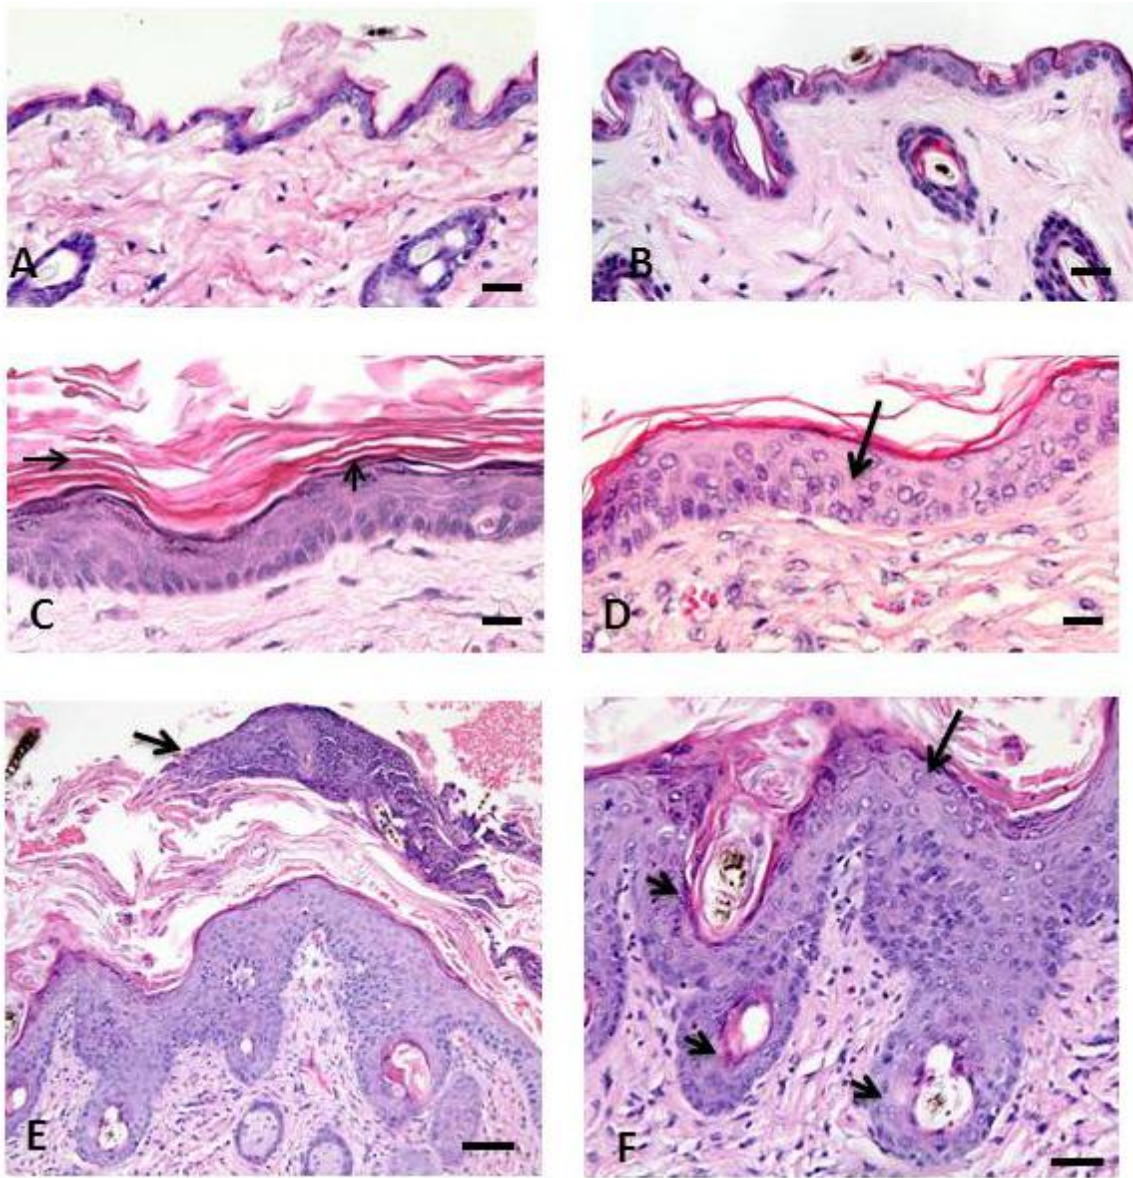

**Supplementary Figure 2** Epidermal hyperplasia in mild to moderate lesions. (a) Epidermis from transgenic mouse not exposed to doxycycline. Note continuous basal layer, 1-2 cell thick spinous layer, and thin stratum corneum (bar = 50  $\mu$ m). (b) Normal epidermis 200  $\mu$ m from area of hyperplasia (bar = 50  $\mu$ m). (c) Overexpression of SRSF6 for 7 days leads to mild epidermal hyperplasia. Note the orthokeratotic hyperkeratotic (arrow) stratum corneum. The granular layer is also more prominent (short arrow) (bar = 50  $\mu$ m). (d) Prominent thickened stratum spinosum (arrow) and minimal dysplasia in mild early lesion (bar = 50  $\mu$ m). (e) Overexpression of SRSF6 for 14 days results in severe hyperplasia. Note the severe hyperplasia in the epidermis and hair follicles and thick parakeratotic hyperkeratotic crust (arrow) (bar = 100  $\mu$ m). (f) Higher magnification of e. There is severe hyperplasia of the epidermis (arrow) and hair follicles (short arrow) (bar = 100  $\mu$ m).

**Supplementary Figure 3:** Abnormalities in the epidermis following overexpression of SRSF6 for 14-21 days.

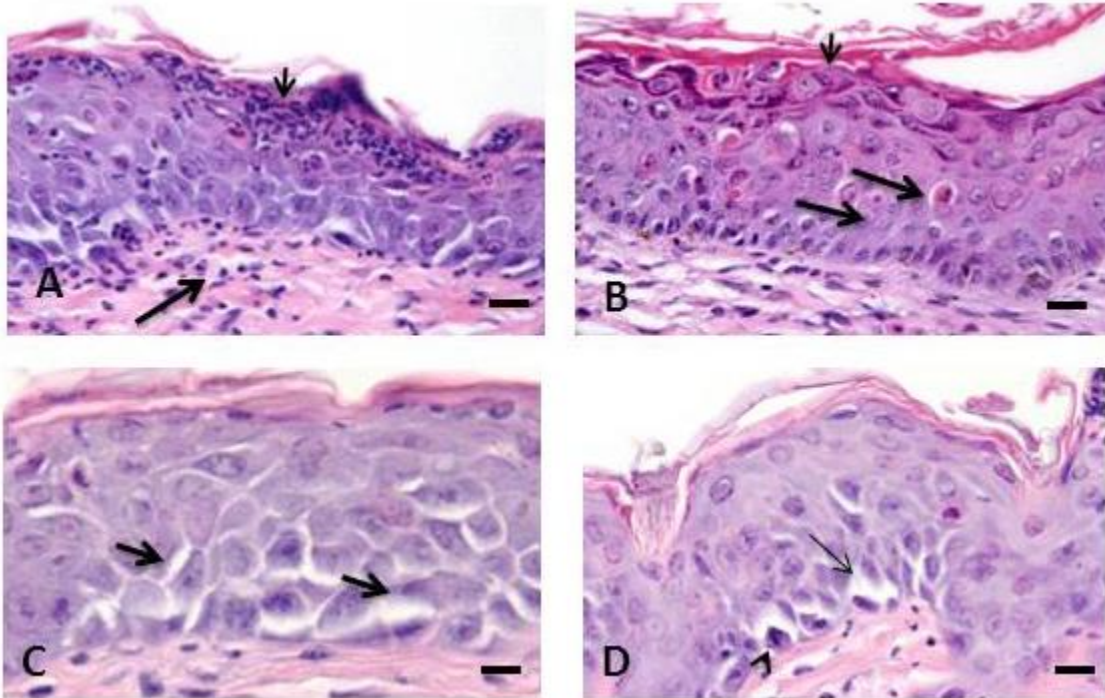

**Supplementary Figure 3** Abnormalities in the epidermis following overexpression of SRSF6 for 14-21 days. (a) Intra-epidermal microabscess (short arrow) and mild inflammation (arrow) at the disturbed dermal-epidermal interface. (bar = 100  $\mu$ m). (b) Multiple apoptotic bodies (arrows) and dyskeratosis (faulty development of the epidermis with abnormal keratinization) (short arrow) (bar = 100  $\mu$ m). (c) Spongiosis (loss of adhesion and intercellular edema) in the epidermis (bar = 100  $\mu$ m). (d) Basal cell apoptosis (Civatte body) (arrow), spongiosis, and dyskeratosis (bar = 100  $\mu$ m).



**Supplementary Figure 4:** Verrucose hyperplasia in plucked skin of mice overexpressing SRSF6 for 21 days.

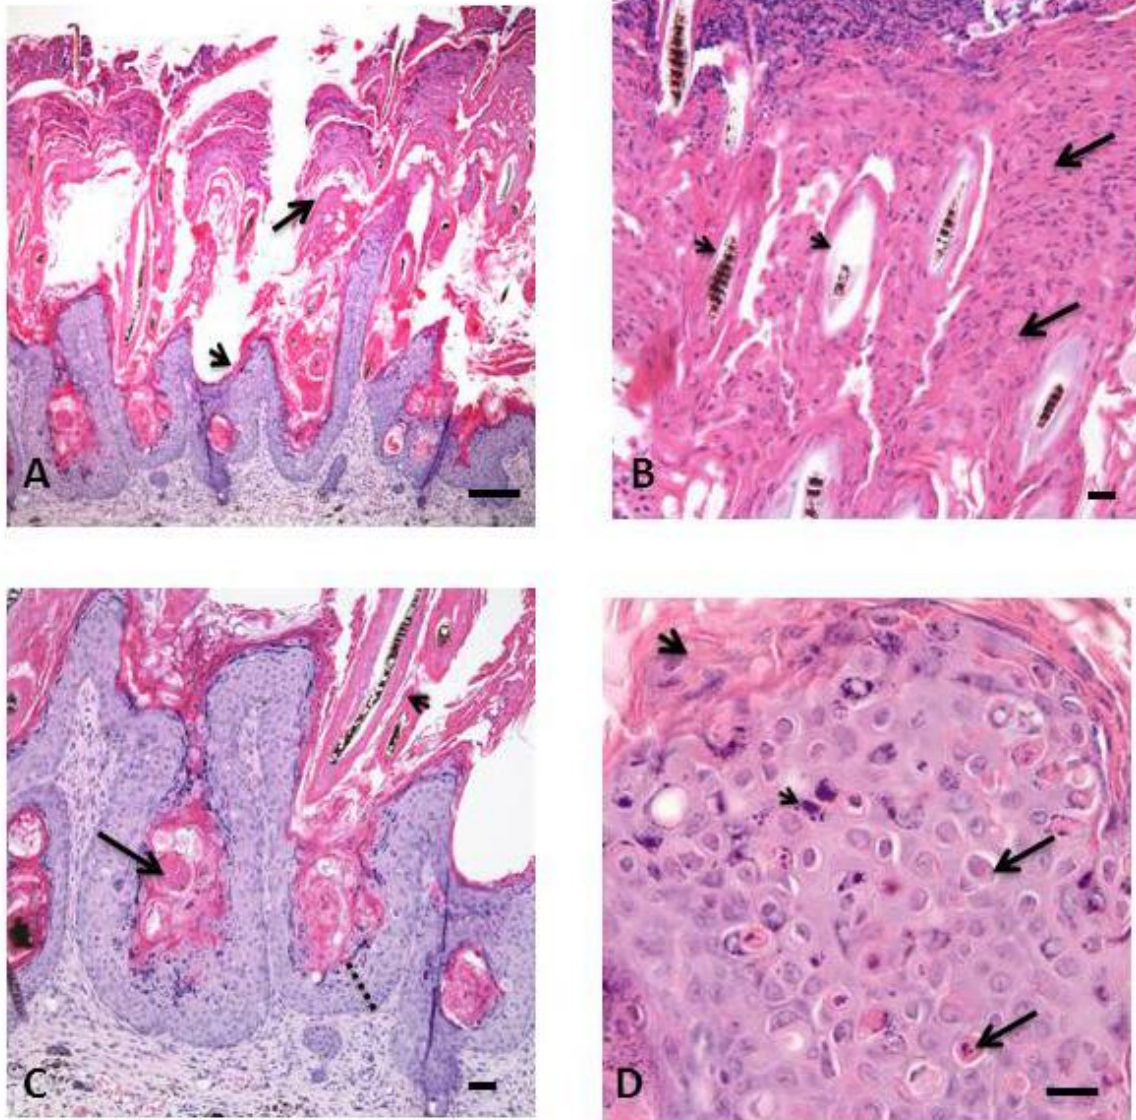

**Supplementary Figure 4** Verrucose hyperplasia in plucked skin of mice overexpressing SRSF6 for 21 days. (a) Severe epidermal hyperplasia (short arrow) and exorbitant parakeratotic hyperkeratosis (arrow) (bar = 100  $\mu$ m). (b) Dyskeratosis with severe parakeratosis (arrows). Hair follicles (short arrows) are trapped in the rapidly proliferating hyperplastic epidermis (bar = 50  $\mu$ m). (c) Thickened epidermis (dotted line) with extensive hyperkeratosis and keratin pearls trapped in the hyperplastic stratum corneum (arrow) (bar = 50  $\mu$ m). (d) Severe dysplasia with severe dyskeratosis, excessive apoptotic bodies (arrows), and dysplastic keratinocytes (short arrows) (bar = 25  $\mu$ m).

**Supplementary Figure 5:** Gene expression analysis of SRSF6-overexpressing skin.

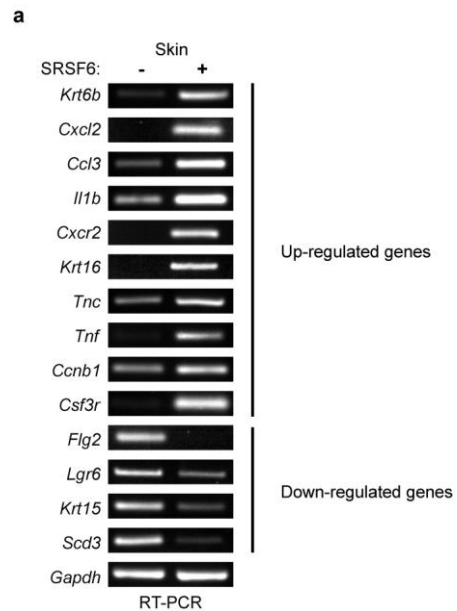

**Supplementary Figure 5** RT-PCR validation of differentially expressed genes upon SRSF6 overexpression in skin. 14 out of 14 genes tested were successfully validated by RT-PCR. Confirmed upregulated genes include: genes induced upon tissue injury, such as *Keratin 6 (Krt6)* (microarray: +154-fold), *Keratin 16 (Krt16)* (microarray: +13-fold) and *tenascin C (Tnc)* (microarray: +6-fold); and pro-inflammatory cytokines important for wound healing, such as *tumor necrosis factor (Tnf)* (microarray: +6-fold), *Interleukin-1 b (Il1b)* (microarray: +24-fold), *Chemokine (C-X-C motif) ligand 2 (Cxcl2)* (microarray: +97-fold), *Chemokine (C-C motif) ligand 3 (Ccl3)* (microarray: +43-fold). Confirmed downregulated genes included: genes related to skin stem cells, such as *Keratin 15 (Krt15)* (microarray: -5-fold), *Leucine-rich repeat-containing G-protein coupled receptor 6 (Lgr6)* (microarray: -5-fold); and genes related to differentiation, such as *Filaggrin-2 (Fig2)* (microarray: -4-fold) and *Stearoyl-coenzyme A desaturase 3 (Scd3)* (microarray: -18-fold).

**Supplementary Figure 6:** In vitro differentiation of primary keratinocytes.

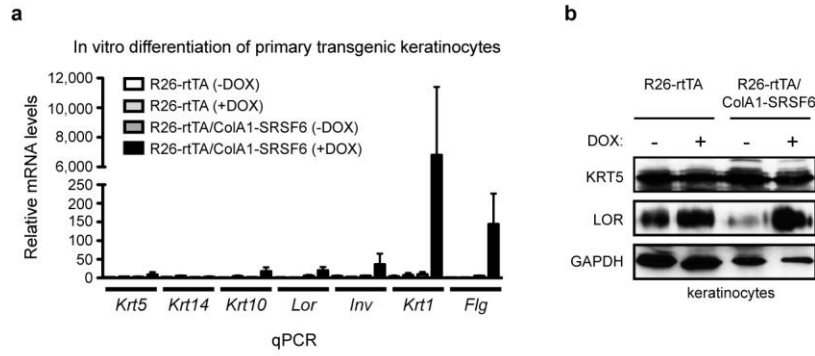

**Supplementary Figure 6** *In vitro* differentiation of primary keratinocytes. Primary keratinocytes from control (R26-rtTA) or double-transgenic (R26-rtTA/ColA1-SRSF6) mice were allowed to differentiate in the presence of 1.2 mM Ca<sup>2+</sup> for 5 d. **(a)** Induction of SRSF6 by DOX-treatment (+) strongly promoted differentiation of primary compared to control keratinocytes, as seen by the strong induction of genes associated with keratinocyte differentiation, measured by RT-qPCR: *loricrin* (*Lor*: +4-fold), *involucrin* (*Inv*: +7-fold), *keratin 1* (*Krt1*: +743-fold), *filaggrin* (*Flg*: +32-fold). In contrast, genes associated with undifferentiated keratinocytes, such as *keratin 5* (*Krt5*: +3-fold) and *keratin 14* (*Krt14*: +2-fold) were relatively unchanged upon SRSF6 induction. **(b)** The corresponding increase in loricrin protein levels upon SRSF6 induction was validated by immunoblotting; no change was observed in DOX-treated control keratinocytes (note: loading was different than for double-transgenic keratinocytes). Keratin 5 protein levels were unaffected by DOX treatment in both control and double-transgenic keratinocytes.

**Supplementary Figure 7: Splicing-target validation.**

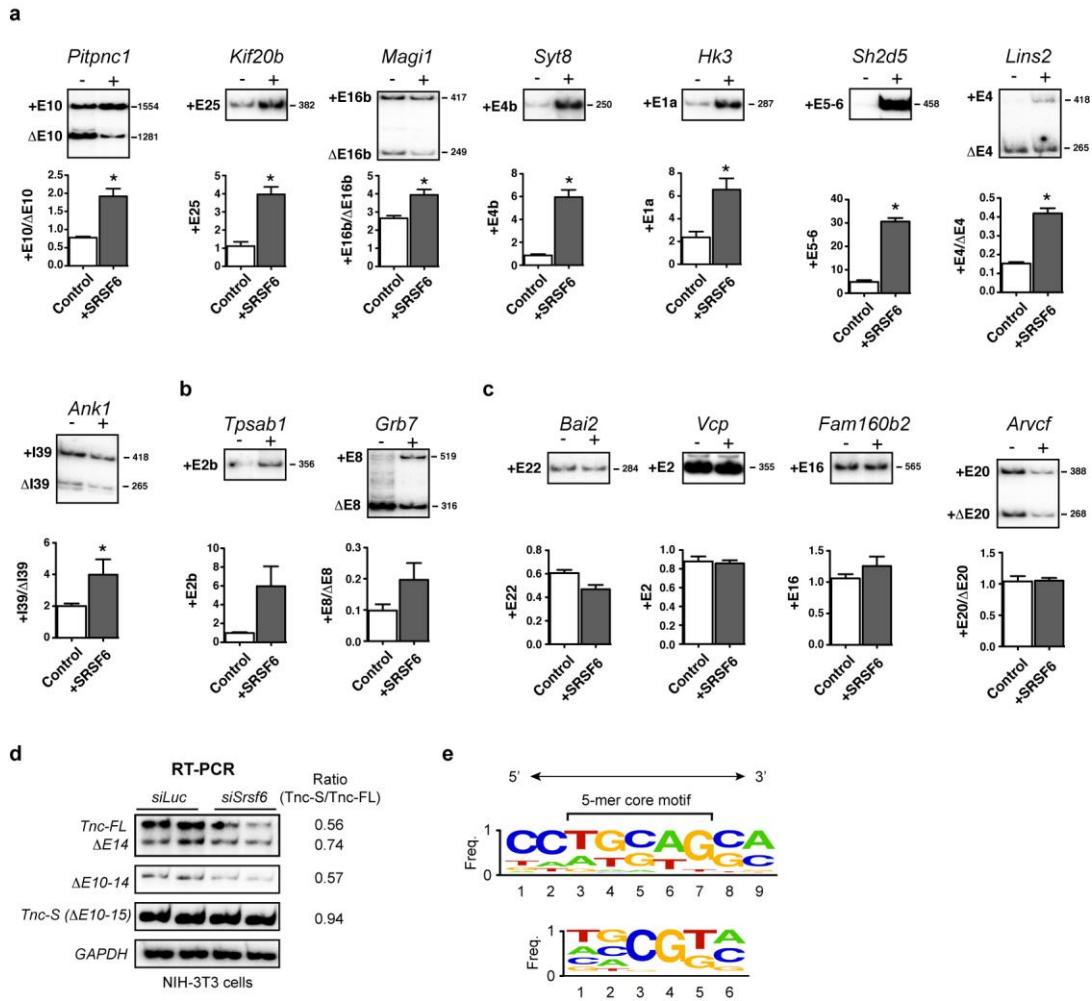

**Supplementary Figure 7** Splicing-target validation. Validation of SRSF6-responsive ASEs using <sup>32</sup>P-radioactive RT-PCR. (a) Strong ASEs with significant change; \*p<0.05: *Phosphatidylinositol transfer protein, cytoplasmic 1* (*Pitpnc1*), *kinesin family member 20B* (*Kif20b*), *membrane-associated guanylate kinase, WW and PDZ domain containing 1* (*Magi1*), *synaptotagmin VIII* (*Syt8*), *hexokinase 3* (*Hk3*), *SH2-domain-containing 5* (*Sh2d5*), *lines homolog (Drosophila)* (*Lins2*), *ankyrin 1, erythrocytic* (*Ank1*), *ETS-domain protein (SRF accessory protein 1)* (*Elk4*), *Pyruvate Kinase 2* (*Pkm2*). (b) Weak ASEs that were not significant: *tryptase alpha/beta* (*Tpsab1*), *growth factor receptor-bound protein 7* (*Grb7*). (c) ASEs that did not show anticipated splicing changes by RT-PCR and therefore could not be validated: *brain-specific angiogenesis inhibitor 2* (*Bai2*), *valosin containing protein* (*Vcp*), *family with sequence similarity 160, member B2* (*Fam160b2*), *armadillo-repeat gene deleted in velocardiofacial syndrome* (*Arvcf*). Statistical analysis employed a Mann-Whitney test (n=10). Data are represented as mean +/- s.e.m. (d) *Tnc* splicing changes upon *Srsf6* knockdown in NIH-3T3 cells. <sup>32</sup>P-radioactive RT-PCR validation shows reciprocal splicing changes in *Tnc* upon *Srsf6* knockdown, using primers specific for *Tnc* exons 9 and 16. *Tnc* +E10-15 and ΔE14 isoforms decreased upon *Srsf6* depletion, whereas *Tnc*-S (ΔE10-15) (constitutive isoform) was unaffected. Lanes shown correspond to two biological replicates. (e) Pictogram of the predicted SRSF6 in vivo binding motif (9-mer; CCWKSWSM, Top) which shows similarity to the reported SRSF6 functional SLEX binding motif (6-mer; YRCRKM, Bottom). The central 5-mer of the predicted SRSF6 in vivo binding motif is denoted '5-mer core motif'.



**Supplementary Figure 8: SRSF6 and its target TNC is required for wound healing in vitro.**

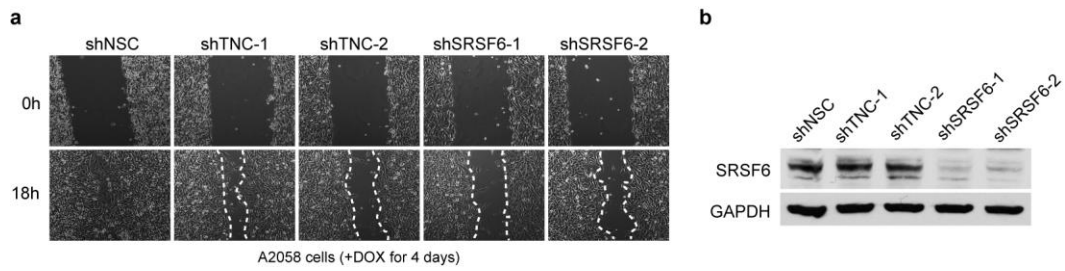

**Supplementary Figure 8** *SRSF6* and its target *TNC* are required for wound healing *in vitro*. **(a)** Human A2058 melanoma cells transduced with inducible short-hairpins against either *TNC* or *SRSF6* were used for wound-healing assays. Cells were treated with DOX (10  $\mu$ g/ml) for 4 d in total. Cell migration was measured over 18 h. Knockdown of either *SRSF6* or *TNC* impairs wound healing (2 shRNAs per gene). **(b)** Immunoblotting confirms efficient *SRSF6* knockdown. NSC=no-silencing control.

**Supplementary Figure 9: Original images**

**a** Original DNA gel image (Fig. 1a)

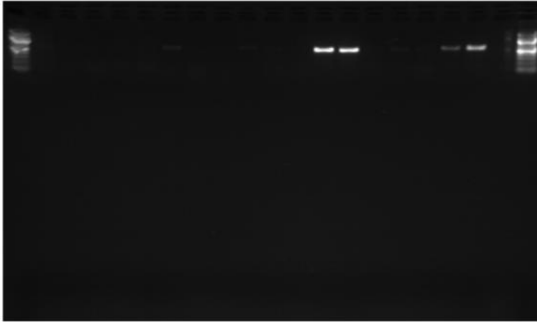

**b** Original DNA gel image (Fig. 1a)

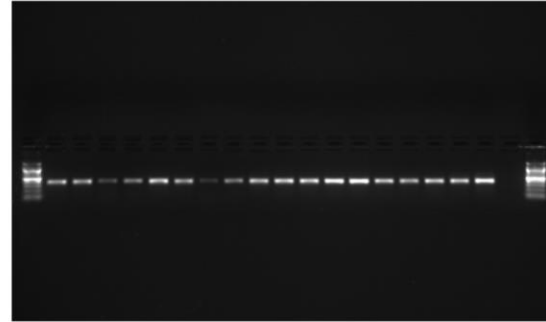

**c** Original DNA gel image (Fig. 1a)

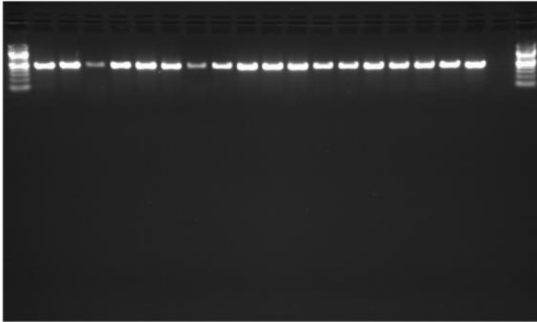

**d** Original western blotting image (Fig. 3d)

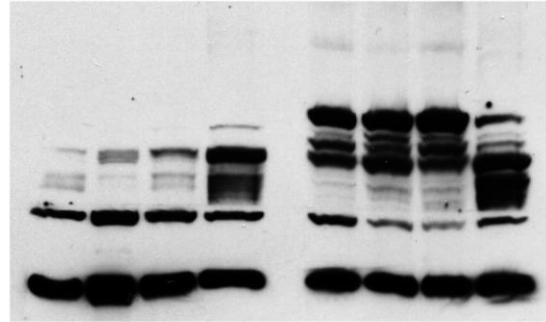

**e** Original IP western blotting image (Fig. 5d)

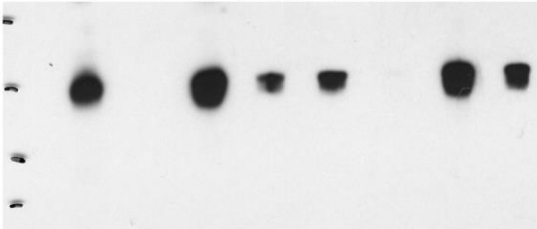

**f** Original western blotting image (Fig. 5e)

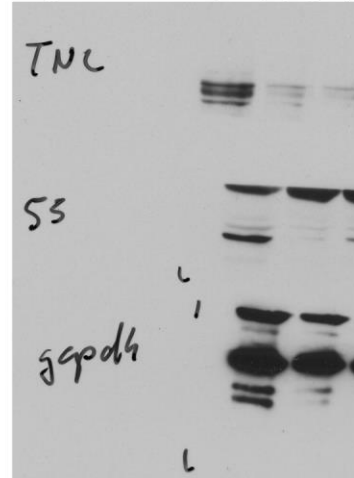

**Supplementary Table 1a:** Summary of transgenic mouse studies.

| Genotype                    | DOX | Hyperplasia (Skin) | Hyperplasia (Small Intestine) |
|-----------------------------|-----|--------------------|-------------------------------|
| <i>WT</i>                   | Yes | 0/4                | 0/4                           |
| <i>R26-rtTA/ColA1-SRSF6</i> | No  | 0/4                | 0/4                           |
| <i>R26-rtTA/ColA1-SRSF6</i> | Yes | 8/8 (p=0.0002)     | 5/9 (p=0.03)                  |

Fisher's exact test was used for statistical analysis (n=16 and n=17).

**Supplementary Table 1b:** Summary of allogenic skin transplantation studies.

| Name | Graft genotype              | Recipient genotype | Graft: GFP+ (+DOX for 1 week) | Pathology        |
|------|-----------------------------|--------------------|-------------------------------|------------------|
| C1   | <i>R26-rtTA</i>             | Wt (nude)          | No                            | Normal skin      |
| C2   | <i>Wt</i>                   | Wt (nude)          | No                            | Normal skin      |
| C3   | <i>Wt</i>                   | Wt (nude)          | No                            | Normal skin      |
| G1   | <i>R26-rtTA/ColA1-SRSF6</i> | Wt (nude)          | Yes                           | Skin hyperplasia |
| G2   | <i>R26-rtTA/ColA1-SRSF6</i> | Wt (nude)          | Yes                           | Skin hyperplasia |
| G3   | <i>R26-rtTA/ColA1-SRSF6</i> | Wt (nude)          | Yes                           | Skin hyperplasia |

**Supplementary Table 2:** Gene expression analysis, functional gene annotation analysis, and splicing targets (separate excel-file).

**Supplementary Table 3a:** Summary of splicing-target analysis.

| Validated | ASE (ratio) | ASE (percent) | Gene (ratio) | Gene (percent) |
|-----------|-------------|---------------|--------------|----------------|
| All       | 16/22       | 72.7%         | 11/17        | 64.7%          |
| SI  >2    | 12/14       | 85.7%         | 7/9          | 77.8%          |
| SI  <2    | 4/8         | 50.0%         | 4/8          | 50.0%          |

**Supplementary Table 3b:** Analysis of 5' splice site strength of alternatively spliced region of *Tnc*.

| <i>Tnc</i> | Type      | Splice site      | Score        | Base pairs | $\Delta G$ (Free Energy) | Freq. Motif A | Freq. Motif B | Freq. Motif C | Exon size  |
|------------|-----------|------------------|--------------|------------|--------------------------|---------------|---------------|---------------|------------|
| E9         | 5'        | CGGgtaagt        | 90.84        | 9          | -9.4                     | 3             | 2             | 1             | 90         |
| <b>E10</b> | <b>5'</b> | <b>CAGgtactt</b> | <b>77.2</b>  | <b>7</b>   | <b>-4.8</b>              | <b>3</b>      | <b>6</b>      | <b>1</b>      | <b>264</b> |
| <b>E11</b> | <b>5'</b> | <b>CAGgtattt</b> | <b>77.98</b> | <b>8</b>   | <b>-4.9</b>              | <b>2</b>      | <b>8</b>      | <b>0</b>      | <b>273</b> |
| <b>E12</b> | <b>5'</b> | <b>CAGgtatca</b> | <b>72.27</b> | <b>7</b>   | <b>-4.9</b>              | <b>6</b>      | <b>9</b>      | <b>0</b>      | <b>273</b> |
| <b>E13</b> | <b>5'</b> | <b>CAGgtacat</b> | <b>77.38</b> | <b>7</b>   | <b>-4.8</b>              | <b>2</b>      | <b>6</b>      | <b>2</b>      | <b>273</b> |
| <b>E14</b> | <b>5'</b> | <b>CAGgtattt</b> | <b>77.98</b> | <b>8</b>   | <b>-4.9</b>              | <b>6</b>      | <b>10</b>     | <b>0</b>      | <b>273</b> |
| <b>E15</b> | <b>5'</b> | <b>CAGgtactg</b> | <b>72.03</b> | <b>6</b>   | <b>-4.8</b>              | <b>1</b>      | <b>6</b>      | <b>0</b>      | <b>273</b> |
| E16        | 5'        | GAGgtaggg        | 81.68        | 7          | -8.5                     | 3             | 5             | 1             | 123        |

- a) Summary of splicing-target analysis. Validation success rates were measured for either alternative splicing events (ASEs) or genes; weak splicing change (|SI|<2), strong splicing change (|SI|>2), or all.
- b) Analysis of 5' splice site strength was performed as described in Methods. SRSF6 motif frequency analysis was done based on the presence of MEME-predicted or SELEX SRSF6 motifs, and calculated as the number of motifs per exon; Motif A (9-mer SRSF6 in vivo: CCWKSWSGSM), Motif B (SRSF6 in vivo (5-mer core motif): WKSWG), or Motif C (SRSF6 SELEX: HVCCKM) were mapped using the SFmap algorithm<sup>1</sup>. Motifs are in IUPAC format. Settings used were: window size=50, significant p-value (0.01), suboptimal p-value (0.05) and scoring function=WR. Average number of motifs per exon was: Motif A (alternative region=3.3, constitutive region=3.0), Motif B (alternative region=7.5, constitutive region=3.5), and Motif C (alternative region=0.5, constitutive region=1.0). Alternative exons are in bold (E10-15).



**Supplementary Table 4:** Summary of nude mouse tumor studies.

| Genotype:<br>MEFs p53 <sup>-/-</sup> | No. cells injected | No. sites | No. tumors (after 4 weeks) | Average tumor size (mm <sup>3</sup> ) |
|--------------------------------------|--------------------|-----------|----------------------------|---------------------------------------|
| Vector+c-myc                         | 2x10 <sup>6</sup>  | 8         | 0                          | -                                     |
| SRSF6+c-myc                          | 2x10 <sup>6</sup>  | 8         | 8 (p=0.0002)               | 1068.5 (+/-385.5)                     |

Fisher's exact test, n=16, mean+/-s.e.m.

**Supplementary Note 1:** Sequences of RT-PCR/qPCR primers and siRNA oligonucleotides.

| <b>Application*</b> | <b>Name</b> | <b>Sequence (5' to 3')</b> |
|---------------------|-------------|----------------------------|
| GE                  | Ccl3-F      | ATGAAGGTCTCCACCACTGC       |
| GE                  | Ccl3-R      | CCCAGGTCTCTTTGGAGTCA       |
| GE                  | Ccnb1-F     | GGCTGACCCAAACCTCTGTA       |
| GE                  | Ccnb1-R     | TGCAATAAACATGGCCGTTA       |
| GE                  | Csf3r-F     | GCCCCAGTCTACACCCTACA       |
| GE                  | CSf3r-R     | AGGTGTATGTCTGCCCTTG        |
| GE                  | Cxcl2-F     | AGGCTACAGGGGCTGTTGT        |
| GE                  | Cxcl2-R     | TTAGCCTTGCCTTTGTTTCAG      |
| GE                  | Cxcr2-F     | GCTGCCTCACTTTCTCCAG        |
| GE                  | Cxcr2-R     | GACCAGCATACCAAGGAGT        |
| GE                  | Flg2-F      | TGCGTCAGGCCTTATCTAC        |
| GE                  | Flg2-R      | GGCCAGAGCCAGTTTGAATA       |
| GE                  | GAPDH-F     | GAATGGGAAGCTTGTCAACAACGG   |
| GE                  | GAPDH-R     | CCGTTTCTGCTCTGGGATGACCTTG  |
| GE                  | Il1b-F      | GGGCCTCAAAGGAAAGAATC       |
| GE                  | Il1b-R      | TACCAGTTGGGGAACCTCTGC      |
| GE/qPCR             | Krt15-qF    | TGGAGATGCAGATTGAGCAG       |
| GE                  | Krt15-R     | ATGCTGAGCTGAGACTGCAA       |
| GE                  | Krt16-F     | TGATCAGCAGTGTGGAGGAG       |
| GE                  | Krt16-R     | CAGCTTGAGAGGCAGTTGTG       |
| GE                  | Krt6b-F     | CAGGCTGCTGAAGGAGTACC       |
| GE                  | Krt6b-R     | CGCTGGTGGTGTATTTGATG       |
| GE                  | Lgr6-F      | ACCTCTGGCTGGATGACAAT       |
| GE                  | Lgr6-R      | GCCCCATGAAGGCTTTCTCT       |
| GE                  | Scd3-F      | CCTCCTGCAAGCTCTACACC       |
| GE                  | Scd3-R      | CTTCTCGGCTTTTCAAGTCTAG     |
| GE                  | Tnc-E16F    | CCATGAAGGGATTCCGAAGAA      |
| GE                  | Tnc-E18R    | AAACTTGGTGGCGATGGTAG       |
| GE                  | Tnf-F       | GAACTGGCAGAAGAGGGCACT      |
| GE                  | Tnf-R       | CACCTTGGTGGTTTGCTACGA      |
| GE                  | Actb-F      | AGAAAATCTGGCACCAACACC      |
| GE                  | Actb-R      | GTCAGGCAGCTCGTAGCTCT       |
| GE                  | SRSF6-F     | AGCCCGCAGTAGATCTCGAAG      |
| GE                  | SRSF6-R     | TTGAGGGTGGAGCAGGTAGA       |
| GE                  | Ires-R      | AGACCCCTAGGAATGCTCGT       |
| AS                  | Ank1-F      | GGAGGACGACACAGTGGATT       |
| AS                  | Ank1-R      | CCTGCTCGTATTCCTGAAGC       |
| AS                  | Arvcf-F     | CAGGGGACACCTCTGAGAAA       |
| AS                  | Arvcf-R     | GCCTCCTCTCTACCACACA        |
| AS                  | Bai2-F      | CATGCTCATCGGGATTATCG       |
| AS                  | Bai2-R      | TGACAAAAGCCTTGTCCAGAG      |
| AS                  | Elk4-F      | TCTTTGAGGTCCGAGTGTGA       |
| AS                  | Elk4-R      | CCTGCAGAAGCTTGAACCTCC      |
| AS                  | Fam160b2-F  | CCCTTTTGTCTTCTTTTCTCT      |
| AS                  | Fam160b2-R  | CCACCAAGATCTGCTCTCTGT      |
| AS                  | Grb7-F      | CTGGCAGCTTCCCTGAGAT        |
| AS                  | Grb7-R      | GTCCGACTCTGCTCATCTCT       |
| AS                  | Hk3-F1      | AATGTTGAGTGTGCGAGCAG       |
| AS                  | Hk3-R       | TGGTGTGGACCTCACGTATG       |
| AS                  | Kif20b-F    | CCATGGATGACCTAGACGTG       |
| AS                  | Kif20b-R    | CTCTTTGCTGCAGCCTTTCT       |
| AS                  | Lins2-F     | GGATGTGGGAGGAACACAGT       |
| AS                  | Lins2-R     | TCATCTTCAAGAGTGGTTCCAA     |
| AS                  | Magi1-F1    | CAAGGCAGCCAGAACTCTCT       |
| AS                  | Magi1-R1    | GGTGGCAATCTTCTCAGCAT       |
| AS                  | Pitpnc1-F   | GTGGTCCGAGACATCTTGCT       |
| AS                  | Pitpnc1-R   | GGTCTTTGGGAATGGACAGA       |
| AS                  | Pkm2-F      | GTGCTGAAGGCAGTGTGTG        |
| AS                  | Pkm2-R      | CATGGCCAAGTTTACACGAA       |
| AS                  | Sh2d5-F     | TCCTGTGGATGACTTGGACA       |
| AS                  | Sh2d5-R     | TGAAGGGCTCTCGCACTAAT       |
| AS                  | Syt8-F      | CAGGGGAAAAGAACCTTTG        |
| AS                  | Syt8-R      | CACCTTCAGAGTGGCTTTGG       |
| AS/CLIP             | Tnc-E9F     | GAGCCAGGGCAAGAATACAC       |
| AS                  | Tnc-E16R    | AGTGATCCGGAAACTCTCCA       |
| CLIP                | Tnc-E10R    | CTCCACATTGTTGGCTTCTCT      |
| AS                  | Tpsab1-F    | TCCTCACTGTGTCCAAATGC       |
| AS                  | Tpsab1-R    | CGATGTAGAAGTCGGGGTGT       |
| AS                  | Vcp-F       | GTCGCCTGCCTTTCTCATAG       |
| AS                  | Vcp-R       | AGCGGAACCTCGGAGTTTATT      |
| AS                  | Wnk2-F      | ACGAGTGGACAACGAAGACC       |
| AS                  | Wnk2-R      | GTCTGCCGCTTCTTCTCTCTG      |
| qPCR                | Tnc-E8qF    | GGGATTTGGTGTCTTCTGCTGT     |
| qPCR                | Tnc-E9qR    | AGGCTGTAGTTGAGGCGGTA       |
| qPCR/CLIP           | Tnc-E15qF   | CCGAACGTACCAGGGACATA       |

|           |            |                          |
|-----------|------------|--------------------------|
| qPCR/CLIP | Tnc-E16qR  | AGTGATCCGGAACTCTCCA      |
| qPCR      | Lgr4-qF    | CACAACCTGTCTGATCTGCAT    |
| qPCR      | Lgr4-qR    | TGCTGCTTATTTTTGTCCCTGT   |
| qPCR      | Lgr5-qF    | CAGCCTCAAAGTGCTTATGCT    |
| qPCR      | Lgr5-qR    | GTGGCAGGTAAGTATGTGG      |
| qPCR      | Lgr6-qF    | GATGGGGACAGAGGACTCAA     |
| qPCR      | Lgr6-qR    | CCAGCTCTCAAAGAGGTGCT     |
| qPCR      | GAPDH-qF   | AGGTCGGTGTGAACGGATTTG    |
| qPCR      | GAPDH-qR   | TGTAGACCATGTAGTTGAGGTCA  |
| qPCR      | Inv-qF     | ATGTCCCATCAACACACACTG    |
| qPCR      | Inv-qR     | TGGAGTTGGTTGCTTTGCTTG    |
| qPCR      | Flg-qF     | ATGTCCGCTCTCCTGGAAAG     |
| qPCR      | Flg-qR     | TGGATTCTTCAAGACTGCCTGTA  |
| qPCR      | Krt1-qF    | ATGACCAAAGTTGAGCTTCAGG   |
| qPCR      | Krt1-qR    | CAGATCCAACTGCGGTTGTT     |
| qPCR      | Krt5-qF    | CTCTGTGCTTACAAACAGTGTCT  |
| qPCR      | Krt5-qR    | CTTAGCCCGCTACCCAAACC     |
| qPCR      | Krt10-qF   | CGAAGAGCTGGCCTACCTAAA    |
| qPCR      | Krt10-qR   | GGGCAGCGTTCAATTTCCAC     |
| qPCR      | Krt14-qF   | AGCGGCAAGAGTGAGATTTCT    |
| qPCR      | Krt14-qR   | CCTCCAGGTTATTCTCCAGGG    |
| qPCR      | Lor-qF     | CTCCTGTGGGTTGTGAAAGA     |
| qPCR      | Lor-qR     | TGGAACCACCTCCATAGGAAC    |
| qPCR      | Krt15-qR   | TACATCCCGACGGTTTTTCT     |
| CLIP-qPCR | CP-E10F    | GACTGCTCACAACCTCACAGTACC |
| CLIP-qPCR | CP-E10R    | TCTATAAGAAGTGGCAACCTTGA  |
| CLIP-qPCR | CP-E11F    | ACTGGACTGCTCCAGAAGGA     |
| CLIP-qPCR | CP-E11R    | CGTGTGAGCCTCTAGCACCT     |
| CLIP-qPCR | CP-E12F    | TGGCCTATAAGCACTTTGTGCG   |
| CLIP-qPCR | CP-E12R    | GGTACCGTGAGGTTCTGAGC     |
| CLIP-qPCR | CP-E13F    | TCATTGTCTACCTCTCTGGAATTG |
| CLIP-qPCR | CP-E13R    | TGTGGTAGCCGTGGTACTGA     |
| CLIP-qPCR | CP-E14F    | CACATTTAGGAACCCAGAGG     |
| CLIP-qPCR | CP-E14R    | CCTCATAGCCAATGCCAGTT     |
| CLIP-qPCR | CP-E15F    | AGCTGAACCGGAAGTTGACA     |
| CLIP-qPCR | CP-E15R    | AGTCCAGGACAGACGGAAAC     |
| siRNA     | siSrsf6    | CGUUCUAGAUCUCGUUCA       |
| siRNA     | siSrsf6-as | UUGAACGAGAUUCUAGAACG     |
| siRNA     | siLuc      | GCCAUUCUAUCCUCUAGAGGA    |
| siRNA     | siLuc-as   | UCCUCUAGAGGAUAGAAUGGC    |

\*Application: Validation of gene expression (GE), validation of alternative splicing (AS), quantitative RT-PCR validation (qPCR), cross-linking immunoprecipitation (CLIP), quantitative RT-PCR of exon-specific cross-linking immunoprecipitation (CLIP-qPCR) and siRNA oligo sequences (siRNA).

**Supplementary Note 2:** Target sequence information for short-hairpin vectors.

Target sequence (mouse)

shTNC: **CCAAACCATCTTCACAACAAT**  
(pGIPZ (V2LMM\_8781), Thermo Scientific)

Target sequences (human)

shTNC-1: **CGAAATTGAACTCTATGGAAT**  
(pTRIPZ (V2THS\_133232), Thermo Scientific)

shTNC-2: **CAGAGGTGACATGTC AAGCAA**  
(pTRIPZ (V3THS\_321947), Thermo Scientific)

shSRSF6-1: **CCGCAGTAGATCTCGAAGTAT**  
(pTRIPZ (V2THS\_20638), Thermo Scientific)

shSRSF6-2: **GAAATCTAGATCAAAGAGCAA**  
(pTRIPZ(V2THS\_20637), Thermo Scientific)

## Supplementary References

1. Akerman, M., David-Eden, H., Pinter, R.Y. & Mandel-Gutfreund, Y. A computational approach for genome-wide mapping of splicing factor binding sites. *Genome Biol* **10**, R30 (2009).
